# Supplementary material
Source: PubMed Central journal article supplement (PMC4079748)
Supplement: NIHMS592794-supplement-1.pdf [file NIHMS592794-supplement-1.pdf]

**Supplemental Table 1. *MTBP* is commonly co-amplified with *MYC* in multiple human cancers**

| Cancer <sup>a</sup>                                              | Sample # | <i>MTBP</i> amp <sup>b</sup> | <i>MYC</i> amp <sup>b</sup> | <i>MYC</i> and <i>MTBP</i> co-amp <sup>b</sup> | <i>MTBP</i> amp in <i>MYC</i> amp <sup>b,c</sup> | Significance <sup>d</sup> |
|------------------------------------------------------------------|----------|------------------------------|-----------------------------|------------------------------------------------|--------------------------------------------------|---------------------------|
| Ovarian Serous Cystadenocarcinoma                                | 569      | 32.2% (183)                  | 42.0% (239)                 | 31.1% (177)                                    | 74.1% (177/239)                                  | p < 0.0001                |
| Breast Invasive Carcinoma                                        | 913      | 18.7% (171)                  | 21.9% (200)                 | 18.6% (170)                                    | 85.0% (170/200)                                  | p < 0.0001                |
| Hepatocellular Carcinoma                                         | 97       | 19.6% (19)                   | 20.6% (20)                  | 18.6% (18)                                     | 90.0% (18/20)                                    | p < 0.0001                |
| Prostate Adenocarcinoma                                          | 187      | 8.6% (16)                    | 10.2% (19)                  | 8.6% (16)                                      | 84.2% (16/19)                                    | p < 0.0001                |
| Head & Neck Squamous Cell Carcinoma                              | 306      | 8.2% (25)                    | 11.8% (36)                  | 7.8% (24)                                      | 66.7% (24/36)                                    | p < 0.0001                |
| Stomach Adenocarcinoma                                           | 306      | 6.9% (21)                    | 10.5% (32)                  | 6.9% (21)                                      | 65.6% (21/32)                                    | p < 0.0001                |
| Glioma, Lower Grade                                              | 220      | 6.8% (15)                    | 7.3% (16)                   | 6.8% (15)                                      | 93.8% (15/16)                                    | p < 0.0001                |
| Lung Adenocarcinoma                                              | 230      | 7.0% (16)                    | 9.1% (21)                   | 6.1% (14)                                      | 66.7% (14/21)                                    | p < 0.0001                |
| Urothelial Carcinoma                                             | 150      | 6.7% (10)                    | 9.3% (14)                   | 6.0% (9)                                       | 64.3% (9/14)                                     | p < 0.0001                |
| Cutaneous Melanoma                                               | 244      | 5.3% (13)                    | 5.7% (14)                   | 5.3% (13)                                      | 92.9% (13/14)                                    | p < 0.0001                |
| Colon and Rectum Adenocarcinoma                                  | 575      | 4.7% (27)                    | 6.3% (36)                   | 4.5% (26)                                      | 72.2% (26/36)                                    | p < 0.0001                |
| Adenoid Cystic Carcinoma                                         | 60       | 3.3% (2)                     | 5.0% (3)                    | 3.3% (2)                                       | 66.7% (2/3)                                      | p = 0.0017                |
| Cervical Squamous Cell Carcinoma and Endocervical Adenocarcinoma | 126      | 4.0% (5)                     | 7.9% (10)                   | 3.2% (4)                                       | 40.0% (4/10)                                     | p = 0.0001                |
| Renal Chromophobe Carcinoma                                      | 66       | 3.0% (2)                     | 3.0% (2)                    | 3.0% (2)                                       | 100% (2/2)                                       | p < 0.0001                |
| Soft Tissue Sarcoma                                              | 207      | 3.4% (7)                     | 3.4% (7)                    | 2.9% (6)                                       | 85.7% (6/7)                                      | p < 0.0001                |
| Uterine Corpus Endometrioid Carcinoma                            | 363      | 3.0% (11)                    | 8.0% (29)                   | 2.8% (10)                                      | 34.5% (10/29)                                    | p < 0.0001                |
| Glioblastoma Multiforme                                          | 497      | 1.8% (9)                     | 2.0% (10)                   | 1.4% (7)                                       | 70.0% (7/10)                                     | p < 0.0001                |
| Renal Clear Cell Carcinoma                                       | 436      | 0.9% (4)                     | 0.9% (4)                    | 0.9% (4)                                       | 100% (4/4)                                       | p < 0.0001                |
| Lung Squamous Cell Carcinoma                                     | 179      | 0.6% (1)                     | 4.5% (8)                    | 0.6% (1)                                       | 12.5% (1/8)                                      | p = 0.0447                |
| Acute Myeloid Leukemia                                           | 191      | 0.5% (1)                     | 0.5% (1)                    | 0.5% (1)                                       | 100% (1/1)                                       | p = 0.0052                |

<sup>a</sup>Gene copy number gains in *MTBP* and/or *MYC* in human cancers in TCGA from the cBioPortal for Cancer Genomics obtained June 2013.

<sup>b</sup>Percentage of tumors with the indicated amplification and in parentheses, the number of samples

<sup>c</sup>The percentage of tumors with *MTBP* amplified in cancers that had amplified *MYC*.

<sup>d</sup>Significance for *MYC* and *MTBP* co-amplification calculated using a two-tailed Fisher's exact test.
