# Supplementary material
Source: PubMed Central journal article supplement (PMC4079748)
Supplement: NIHMS592794-supplement-2.pdf [file NIHMS592794-supplement-2.pdf]

**TIP48:** amino acid coverage = 33.0% (153/463)

MATVTATTKVPEIRDVTRIERIGAHSHIRGLGLDDALEPROASQGMVGOAARRAAG  
VVLEMIREGKIAGRAVLIAGOPGTGKTAIAMGMAQALGPDTPFTAIAGSEIFSLEMS  
KTEALTOAFRRSIGVRIKEETEIIEGEVVEIQIDRPATGTGSKVGKLTLLKTTEMETI  
YDLGTKMIESLTKDKVQAGDVITIDKATGKISKLGRSFTRARDYDAMGSQTKFVQCP  
DGELQKRKEVVHTVSLHEIDVINSRTQGFLALFSGDTGEIKSEVREQINAKVAEWRE  
EGKAEIIPGVLFIDEVHMLDIESFSFLNRALES DMAPVLI MATNRGITRIRGTSYQS  
PHGIPIDLLDRLLIVSTTPYSEKDTKQILRIRCEEEDVEMSEDAYTVLTRIGLETSL  
RYAIQLITAASLVCRKRKGTEVOVDDIKRVYSLEFLDESRSTQYMKEYQDAFLFNELK  
GETMDTS

**TIP49:** amino acid coverage = 57.9% (264/456)

MKIEEVKSTTKTQRIASHSHVKGLGLDESGLAKQAASGLVGOENAREACGVIVEL  
IKSKKMAGRAVLLAGPPGTGKTALALAI AQELGSKVPFCPMVGSEVYSTEIKKTE  
VL MENFRRAIGLRIKETKEVYEGETELTPCETENPMGGYGKTISHVIIGLKTAK  
GKOLKLDPSIFESLOKERVEAGDVIIYEANS GAVKRQGRCDTYATEFDLEAEEY  
VPLPKGDVHKKKEIIODVTLHDLDVANARPQGGQDILSMMGQLMKPKKTEITDKL  
RGEINKVVNKYIDQGIAELVPGVLFVDEVHMLDIECFTYLHRALESSI APIVIFA  
SNRGNCVIRGTE DITS PHGIPLDLLDRVMIIRTMLYTPQEMKQIIKIRAQTEGIN  
I SEEALNHLGEIGTKTTLRYSVOLLTPANLLAKINGKDSIEKEHVEEISELFYDA  
KSSAKILADQODKYMK

**A**



**B**
